# Supplementary material
Source: PubMed Central journal article supplement (PMC2491374)
Supplement: JCI0832381sd.pdf [file JCI0832381sd.pdf]

Supplemental table 1  
Subject characteristics (n=402)

---

|                          |            |
|--------------------------|------------|
| Age (yr)                 | 61 ± 8.8   |
| Sex, men/women           | 193/209    |
| BMI (kg/m <sup>2</sup> ) | 23 ± 2.8   |
| BP, systolic (mmHg)      | 131 ± 21   |
| BP, diastolic (mmHg)     | 78 ± 12    |
| Smoking, yes/no          | 133/269    |
| LDL-C (mg/dl)            | 149 ± 28   |
| HDL-C (mg/dl)            | 55 ± 15    |
| TG (mg/dl)               | 127 ± 76   |
| LDL size (nm)            | 26 ± 1.0   |
| MDA-LDL (IU/l)           | 115 ± 38   |
| Glucose (mg/dl)          | 96 ± 9.0   |
| Insulin (μU/ml)          | 7.3 ± 6.2  |
| sLR11 (U)                | 3.0 ± 1.0  |
| IMT (mm)                 | 0.79 ± 0.2 |

---

BP;Blood pressure, LDL-C;LDL-cholesterol,  
HDL-C;HDL-cholesterol, TG:Triglycerides,  
MDA-LDL;malondialdehyde LDL.

Supplemental table 2

Univariate analysis of the association of IMT with atherosclerotic risk factors

|                          | r or Mean±SD        | P values |
|--------------------------|---------------------|----------|
| Age (yr)                 | 0.41                | <0.001   |
| Sex, men/women           | 0.84±0.18/0.75±0.19 | 0.001    |
| BMI (kg/m <sup>2</sup> ) | 0.03                | 0.68     |
| BP, systolic (mmHg)      | 0.29                | <0.001   |
| BP, diastolic (mmHg)     | 0.28                | <0.001   |
| Smoking, yes/no          | 0.84±0.19/0.79±0.19 | 0.02     |
| LDL-C(mg/dl)             | 0.04                | 0.58     |
| HDL-C (mg/dl)            | -0.31               | <0.001   |
| TG (mg/dl)               | 0.19                | 0.01     |
| LDL size (nm)            | -0.21               | 0.002    |
| MDA-LDL (IU/l)           | 0.09                | 0.23     |
| Glucose (mg/dl)          | 0.10                | 0.18     |
| Insulin (μU/ml)          | 0.15                | 0.04     |
| sLR11 (U)                | 0.48                | <0.001   |

LDL-C;LDL-cholesterol, HDL-C;HDL-cholesterol, TG:Triglycerides, MDA-LDL;malondialdehyde LDL.

Supplemental table 3

Univariate analysis of the association of sLR11 with atherosclerotic risk factors or IMT

|                          | Men                     |          | Women                   |          |
|--------------------------|-------------------------|----------|-------------------------|----------|
|                          | r or Mean±SD            | P values | r or Mean±SD            | P values |
| Age (yr)                 | 0.18                    | 0.07     | 0.11                    | 0.28     |
| BMI (kg/m <sup>2</sup> ) | 0.19                    | 0.06     | -0.33                   | 0.74     |
| BP, systolic (mmHg)      | 0.37                    | <0.001   | 0.05                    | 0.60     |
| BP, diastolic (mmHg)     | 0.35                    | <0.001   | -0.02                   | 0.86     |
| Smoking, yes/no          | 3.09±0.93<br>/3.09±1.09 | 0.99     | 2.84±1.21<br>/2.93±0.96 | 0.78     |
| LDL-C(mg/dl)             | 0.01                    | 0.94     | 0.21                    | 0.03     |
| HDL-C (mg/dl)            | -0.27                   | 0.008    | -0.31                   | <0.001   |
| TG (mg/dl)               | 0.02                    | 0.89     | 0.19                    | 0.05     |
| LDL size (nm)            | 0.13                    | 0.22     | 0.23                    | 0.02     |
| MDA-LDL (IU/l)           | 0.14                    | 0.18     | 0.16                    | 0.11     |
| Glucose (mg/dl)          | 0.17                    | 0.10     | -0.09                   | 0.35     |
| Insulin (μU/ml)          | 0.06                    | 0.57     | 0.21                    | 0.03     |
| IMT (mm)                 | 0.47                    | <0.001   | 0.49                    | <0.001   |

LDL-C;LDL-cholesterol, HDL-C;HDL-cholesterol, TG:Triglycerides, MDA-LDL;malondialdehyde LDL.

Supplemental table 4

Multivariate assessment of the effect of atherosclerotic risk factors or IMT on sLR11

|                             | OR (95%CI)       | P values |
|-----------------------------|------------------|----------|
| Men                         |                  |          |
| BP, per 10mmHg increase     |                  |          |
| systolic                    | 1.03 (0.70-1.51) | 0.88     |
| diastolic                   | 1.20 (0.59-2.45) | 0.62     |
| HDL-C, per 10mg/dl decrease | 0.99 (0.96-1.03) | 0.65     |
| IMT, per 0.1mm increase     | 1.59 (1.20-2.12) | 0.001    |
| Women                       |                  |          |
| TG, per 10mg/dl increase    | 1.01 (0.91-1.13) | 0.81     |
| LDL size                    | 0.57 (0.29-1.14) | 0.11     |
| Insulin                     | 1.06 (0.94-1.19) | 0.34     |
| LDL-C, per 10mg/dl increase | 1.08 (0.83-1.41) | 0.57     |
| HDL-C, per 10mg/dl decrease | 1.27 (0.80-2.02) | 0.31     |
| IMT, per 0.1mm increase     | 1.47 (1.13-1.92) | 0.005    |

LDL-C;LDL-cholesterol, HDL-C;HDL-cholesterol, TG:Triglycerides, OR, odds ratio.

Supplemental figure 1, Jiang, et al.

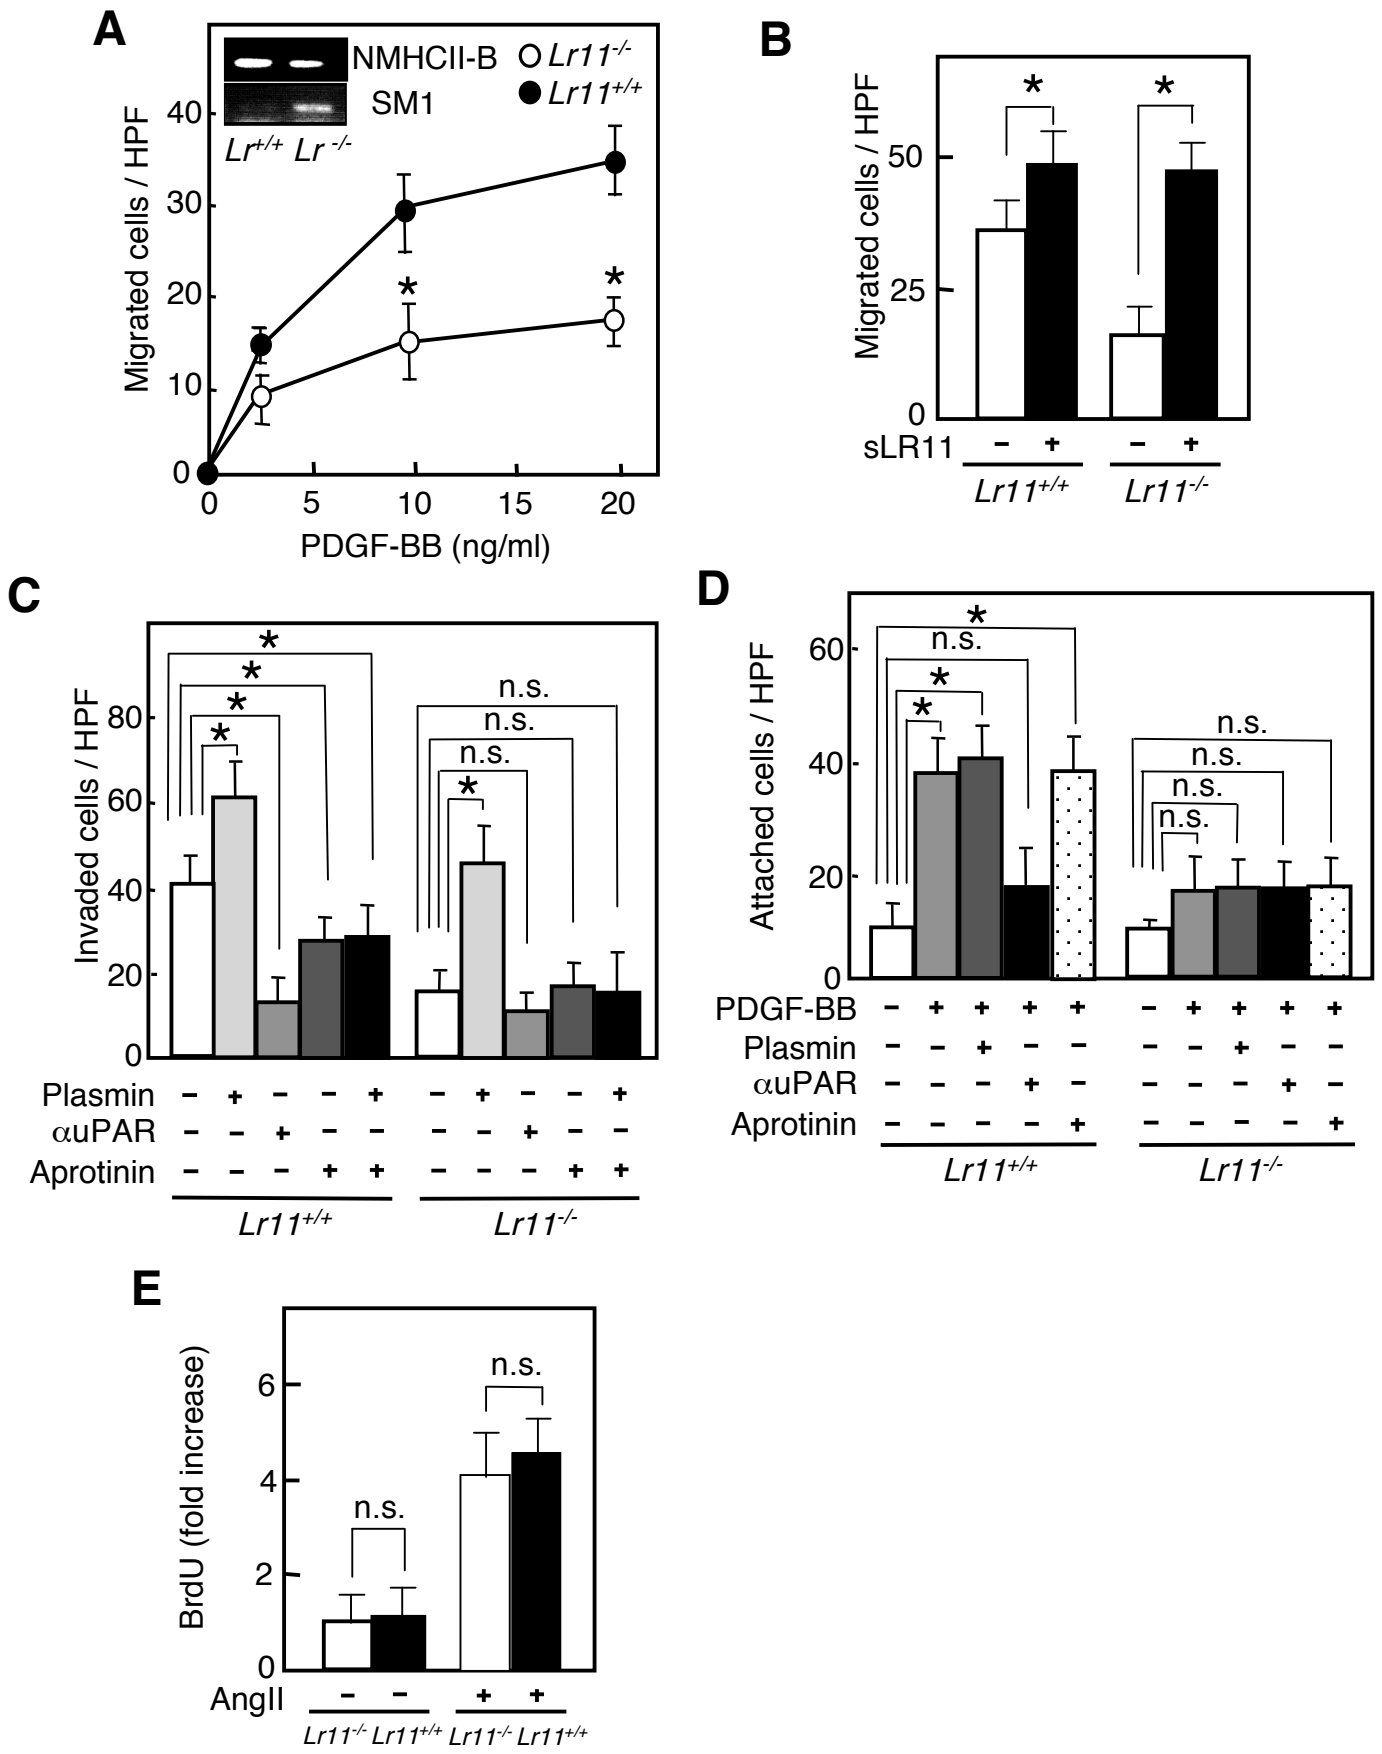

Supplemental figure 1, Jiang, et al.

Figure legend

(A) Migration activity of *Lr11*<sup>+/+</sup> and *Lr11*<sup>-/-</sup> SMCs in the presence of various concentrations of PDGF-BB were analyzed using a Boyden chamber. The products of NMHCII-B and SM1 amplified using RT-PCR in *Lr11*<sup>+/+</sup> and *Lr11*<sup>-/-</sup> SMCs, respectively, are shown in the inset. Data are presented as mean±SD (n = 6). \*P<0.05. The *Lr11*<sup>-/-</sup> SMCs showed decreased levels of NMHCII-B, but increased levels of SM1 expression compared to wild-type SMCs. *Lr11*<sup>-/-</sup> SMCs showed less PDGF-BB-induced migration than *Lr11*<sup>+/+</sup> SMCs, as the number of migrated *Lr11*<sup>-/-</sup> SMCs at 20 ng/ml PDGF-BB was 51% of that of *Lr11*<sup>+/+</sup> SMCs. (B) Effect of sLR11 on the PDGF-BB (10 ng/ml) -induced migration activity of *Lr11*<sup>+/+</sup> or *Lr11*<sup>-/-</sup> SMCs. SMCs were incubated with recombinant sLR11 (1 µg/ml) for 24 h before migration analyses. Data are presented as mean±SD (n = 6). \*P<0.05. In the presence of recombinant sLR11, the decreased PDGF-mediated migration activity of *Lr11*<sup>-/-</sup> SMCs was restored almost to that of *Lr11*<sup>+/+</sup> SMCs. (C) Effect of blocking the uPAR/uPA/plasmin system on the PDGF-BB (10 ng/ml) -induced invasion activity of *Lr11*<sup>+/+</sup> or *Lr11*<sup>-/-</sup> SMCs. SMCs were incubated with plasmin (10 nM), anti-uPAR antibody (10 µg/ml), or aprotinin (100 KIU/ml) for 24 h before invasion analyses. Data are presented as mean±SD (n = 6). \*P<0.05. n.s., not significant. Collagen gel invasion was significantly decreased in *Lr11*<sup>-/-</sup> SMCs compared to *Lr11*<sup>+/+</sup> SMCs; although plasmin increased the PDGF-induced invasion activity of *Lr11*<sup>-/-</sup> SMCs, the resulting activity level in *Lr11*<sup>-/-</sup> SMCs was still only 71 % of that of *Lr11*<sup>+/+</sup> SMCs. Neutralization of uPAR using a blocking antibody or aprotinin, a plasmin inhibitor, did not significantly reduce the invasion activity of *Lr11*<sup>-/-</sup> cells, and the invasion with plasmin plus aprotinin was similar to that with aprotinin alone in both cell types. (D) Effects of blocking the uPAR/uPA/plasmin system on the PDGF-BB (10 ng/ml) -induced attachment of *Lr11*<sup>+/+</sup> or *Lr11*<sup>-/-</sup> SMCs. SMCs were incubated with plasmin (10 nM), anti-uPAR antibody (10 µg/ml), or aprotinin (100 KIU/ml) for 24 h before attachment analyses. Data are presented as mean±SD (n = 6). \*P<0.05. n.s., not significant. The attachment of *Lr11*<sup>-/-</sup> SMCs in the presence of PDGF-BB was reduced, and the activity was not recovered by addition of plasmin. (E) Proliferation activity of *Lr11*<sup>+/+</sup> and *Lr11*<sup>-/-</sup> SMCs in the presence or absence of 1µM AngII for 8 h before BrdU incorporation analyses. Data are presented as mean±SD (n = 3). n.s., not significant. There were no significant difference in BrdU incorporation between *Lr11*<sup>+/+</sup> and *Lr11*<sup>-/-</sup> SMCs in the presence or absence of recombinant AngII.

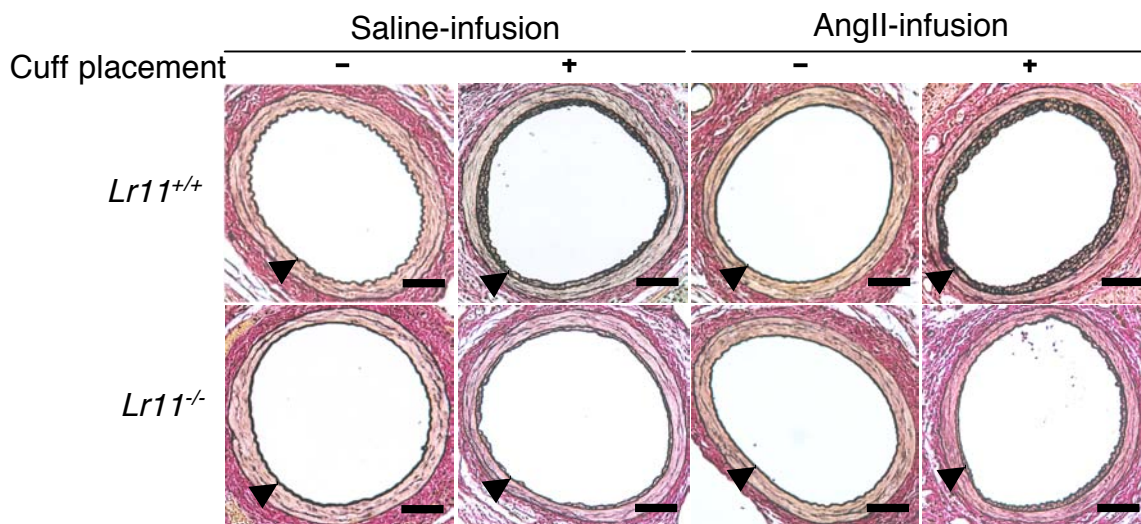

Figure legend

EVG-stained sections of femoral arteries with or without cuff placement in the presence of AngII or saline infusion in *Lr11<sup>+/+</sup>* or *Lr11<sup>-/-</sup>* mice. Arrowheads indicate the internal elastic layers. Scale bar, 50  $\mu$ m. Systemic blood pressure values four weeks after cuff placement were significantly higher in the AngII-infused mice than those in the saline-infused mice ( $119\pm 7$  mmHg vs  $106\pm 7$  mmHg for *Lr11<sup>+/+</sup>* mice, and  $121\pm 7$  mmHg vs  $110\pm 6$  mmHg for *Lr11<sup>-/-</sup>* mice, respectively,  $P<0.05$ ,  $n=8$  for each group).

Supplemental figure 3, Jiang, et al.

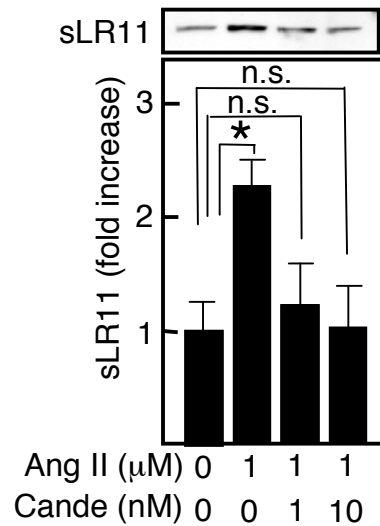

Figure legend

Effect of ARB on the AngII-dependent increase in sLR11 in rabbit SMCs. Conditioned media collected for 12 h in the presence or absence of AngII with/without candesartan (cande) at the indicated concentrations were subjected to immunoblot analysis using anti-LR11 (~250kDa) antibody. Photograph shown is representative of 3 independent experiments. Data were presented as mean±SD (n = 3). \*P<0.05, n.s., not significant. The AngII-mediated increase in sLR11 levels was blocked by ARB candesartan.
